# Supplementary material for: A combined experimental and theoretical study of the thermal cycloaddition of aryl azides with activated alkenes
Source: Royal Society of Chemistry journal article supplement (doi:10.1039/c1ob05176h), 2011-01-01
Supplement: c1ob05176h.pdf [file c1ob05176h.pdf]

## SUPPORTING INFORMATION

### A combined experimental and theoretical study of the thermal cycloaddition of aryl azides with activated alkenes

Sarah Zeghada, Ghenia Bentabed-Ababsa, Aïcha Derdour, Safer Abdelmounim,  
Luis R. Domingo, José A. Sáez, Thierry Roisnel, Ekhllass Nassar and Florence Mongin

#### Index

|                                                                                                                                                                                                                                                                                      | Page |
|--------------------------------------------------------------------------------------------------------------------------------------------------------------------------------------------------------------------------------------------------------------------------------------|------|
| <b>Table S1.</b> B3LYP/6-31G* Total energies in gas phase and in solution, of the stationary points involved in the thermal domino reactions of the $\beta$ -dicarbonyl compounds <b>2</b> with the phenyl azides <b>1</b> .                                                         | 1    |
| <b>Table S2.</b> B3LYP/6-311+G** Total (E, in au.) and relative energies ( $\Delta E$ , in kcal/mol) in gas phase and in solution, of the stationary points involved in the thermal domino reactions of the $\beta$ -dicarbonyl compounds <b>2</b> with the phenyl azides <b>1</b> . | 2    |
| <b>Table S3.</b> B3LYP/6-311+G** Lengths (in angstroms), asynchronicity ( $\Delta t$ ), charge transfer (CT, in e), and bond orders (BO) of the C-N forming bonds involved in the 32CA reactions between the enols <b>2'</b> and the phenyl azides <b>1</b> .                        | 3    |
| <b>Table S4.</b> B3LYP/6-311+G** Lengths of the breaking and forming bonds (in angstroms) at the TSs involved in the water elimination.                                                                                                                                              | 3    |
| <b>Figure S1.</b> B3LYP/6-31G* Transition states involved in the regioisomeric channels 1 and 2 associated with the 13DC reaction between the enol <b>2'a-Z</b> and phenyl azide ( <b>1e</b> ).                                                                                      | 4    |
| <b><sup>1</sup>H and <sup>13</sup>C NMR spectra.</b> Compounds <b>3a-h</b> , <b>5a,b</b> , <b>8</b> and <b>10</b> .                                                                                                                                                                  | 5    |
| <b>X-Ray diagrams.</b> Compounds <b>3b,c,f</b> and <b>5a</b>                                                                                                                                                                                                                         | 17   |

**Table S1.** B3LYP/6-31G\* Total energies in gas phase and in solution, of the stationary points involved in the thermal domino reactions of the  $\beta$ -dicarbonyl compounds **2** with the phenyl azides **1**.

|               | E            | Esolv        |
|---------------|--------------|--------------|
| <b>1</b>      | -600.339478  | -600.351888  |
| <b>1e</b>     | -395.838293  | -395.845107  |
| <b>2a</b>     | -345.783930  | -345.798120  |
| <b>2'a-Z</b>  | -345.799880  | -345.806354  |
| <b>2'a-E</b>  | -345.781300  | -345.796587  |
| <b>2b</b>     | -421.025418  | -421.034564  |
| <b>2'b-Z</b>  | -421.028507  | -421.034809  |
| <b>2'b-E</b>  | -421.012961  | -421.027779  |
| <b>TS11ea</b> | -741.600612  | -741.612040  |
| <b>TS12ea</b> | -741.587347  | -741.600954  |
| <b>6ea</b>    | -741.643397  | -741.656283  |
| <b>6ea</b>    | -741.638813  | -741.658358  |
| <b>TS11a</b>  | -946.106113  | -946.122814  |
| <b>TS12a</b>  | -946.087754  | -946.106151  |
| <b>61a</b>    | -946.146725  | -946.164719  |
| <b>62a</b>    | -946.142062  | -946.166785  |
| <b>TS11b</b>  | -1021.334266 | -1021.351315 |
| <b>TS12b</b>  | -1021.320116 | -1021.337592 |
| <b>61b</b>    | -1021.377031 | -1021.395400 |
| <b>62b</b>    | -1021.376075 | -1021.397792 |
| <b>IN11a</b>  | -1120.965805 | -1121.050323 |
| <b>IN12a</b>  | -1120.956200 | -1121.038231 |
| <b>TS21a</b>  | -1120.959295 | -1121.041749 |
| <b>TS22a</b>  | -1120.948580 | -1121.032334 |
| <b>31a</b>    | -869.748115  | -869.766034  |
| <b>32b</b>    | -869.736532  | -869.755960  |
| <b>IN11b</b>  | -1196.196328 | -1196.281071 |
| <b>IN12b</b>  | -1196.190484 | -1196.272085 |
| <b>TS21b</b>  | -1196.190990 | -1196.272255 |
| <b>TS22b</b>  | -1196.185951 | -1196.265085 |
| <b>31b</b>    | -944.974472  | -944.994347  |
| <b>32b</b>    | -944.970063  | -944.988637  |

**Table S2.** B3LYP/6-311+G\*\* Total (E, in au.) and relative energies ( $\Delta E$ , in kcal/mol) in gas phase and in solution, of the stationary points involved in the thermal domino reactions of the  $\beta$ -dicarbonyl compounds **2** with the phenyl azides **1**.

|               | E            | $\Delta E$ | Esolv        | $\Delta E_{\text{solv}}$ |
|---------------|--------------|------------|--------------|--------------------------|
| <b>1</b>      | -600.506010  |            | -600.520865  |                          |
| <b>1e</b>     | -395.943084  |            | -395.951121  |                          |
| <b>2a</b>     | -345.890473  |            | -345.890473  |                          |
| <b>2'a-Z</b>  | -345.911074  | -12.9      | -345.911074  | -7.2                     |
| <b>2'a-E</b>  | -345.893729  | -2.0       | -345.893729  | -2.1                     |
| <b>2b</b>     | -421.156795  |            | -421.156795  |                          |
| <b>2'b-Z</b>  | -421.163543  | -4.2       | -421.163543  | -2.2                     |
| <b>2'b-E</b>  | -421.149430  | 4.6        | -421.149430  | 1.2                      |
| <b>TS11ea</b> | -741.811345  | 26.9       | -741.825137  | 28.2                     |
| <b>TS12ea</b> | -741.798498  | 34.9       | -741.814887  | 34.7                     |
| <b>6ea</b>    | -741.846959  | 4.5        | -741.865055  | 3.2                      |
| <b>6ea</b>    | -741.848999  | 3.2        | -741.871886  | -1.1                     |
| <b>TS11a</b>  | -946.378068  | 24.5       | -946.397931  | 26.3                     |
| <b>TS12a</b>  | -946.360917  | 35.3       | -946.383078  | 35.6                     |
| <b>61a</b>    | -946.416262  | 0.5        | -946.437569  | 1.4                      |
| <b>62a</b>    | -946.413912  | 2.0        | -946.443010  | -2.0                     |
| <b>TS11b</b>  | -1021.630101 | 20.5       | -1021.650338 | 23.9                     |
| <b>TS12b</b>  | -1021.616738 | 28.9       | -1021.637672 | 31.9                     |
| <b>61b</b>    | -1021.670566 | -4.9       | -1021.692365 | -2.5                     |
| <b>62b</b>    | -1021.670825 | -5.0       | -1021.697461 | -5.7                     |
| <b>IN11a</b>  | -1121.283449 |            | -1121.371536 |                          |
| <b>IN12a</b>  | -1121.273672 |            | -1121.359182 |                          |
| <b>TS21a</b>  | -1121.277386 | 3.8        | -1121.362875 | 5.4                      |
| <b>TS22a</b>  | -1121.266585 | 4.5        | -1121.354225 | 3.1                      |
| <b>31a</b>    | -869.984287  | -16.1      | -870.005820  | -23.7                    |
| <b>32b</b>    | -869.973009  | -9.0       | -869.995799  | -17.4                    |
| <b>IN11b</b>  | -1196.537390 |            | -1196.625392 |                          |
| <b>IN12b</b>  | -1196.531042 |            | -1196.625392 |                          |
| <b>TS21b</b>  | -1196.532351 | 3.2        | -1196.616796 | 5.4                      |
| <b>TS22b</b>  | -1196.526985 | 2.6        | -1196.612751 | 7.9                      |
| <b>31b</b>    | -945.234333  | -18.8      | -945.257916  | -25.9                    |
| <b>32b</b>    | -945.229914  | -16.1      | -945.251972  | -22.2                    |

**Table S3.** B3LYP/6-311+G\*\* Lengths (in angstroms), asynchronicity ( $\Delta l$ ), charge transfer (CT, in e), and bond orders (BO) of the C-N forming bonds involved in the 32CA reactions between the enols **2'** and the phenyl azides **1**.

|               | N1-C5(4) | N3-C4(5) | $\Delta l$ | CT    | BO N1-C5(4) | BO N3-C4(5) |
|---------------|----------|----------|------------|-------|-------------|-------------|
| <b>TS11ea</b> | 1.998    | 2.157    | 0.16       | -0.18 | 0.47        | 0.31        |
| <b>TS12ea</b> | 1.885    | 2.155    | 0.27       | -0.09 | 0.50        | 0.35        |
| <b>TS11a</b>  | 1.952    | 2.228    | 0.28       | -0.27 | 0.50        | 0.27        |
| <b>TS12a</b>  | 1.892    | 2.135    | 0.24       | -0.14 | 0.50        | 0.36        |
| <b>TS11b</b>  | 1.957    | 2.240    | 0.28       | -0.27 | 0.50        | 0.26        |
| <b>TS12b</b>  | 1.935    | 2.128    | 0.19       | -0.16 | 0.47        | 0.36        |

**Table S4.** B3LYP/6-311+G\*\* Lengths of the breaking and forming bonds (in angstroms) at the TSs involved in the water elimination.

|              | C4-O6 | O8-H7 | H7-O6 | H9-N10 |
|--------------|-------|-------|-------|--------|
| <b>TS21a</b> | 1.629 | 1.286 | 1.129 | 2.037  |
| <b>TS22a</b> | 1.700 | 1.550 | 1.019 | 2.244  |
| <b>TS21b</b> | 1.621 | 1.268 | 1.142 | 1.983  |
| <b>TS22b</b> | 1.747 | 1.542 | 1.021 | 2.140  |

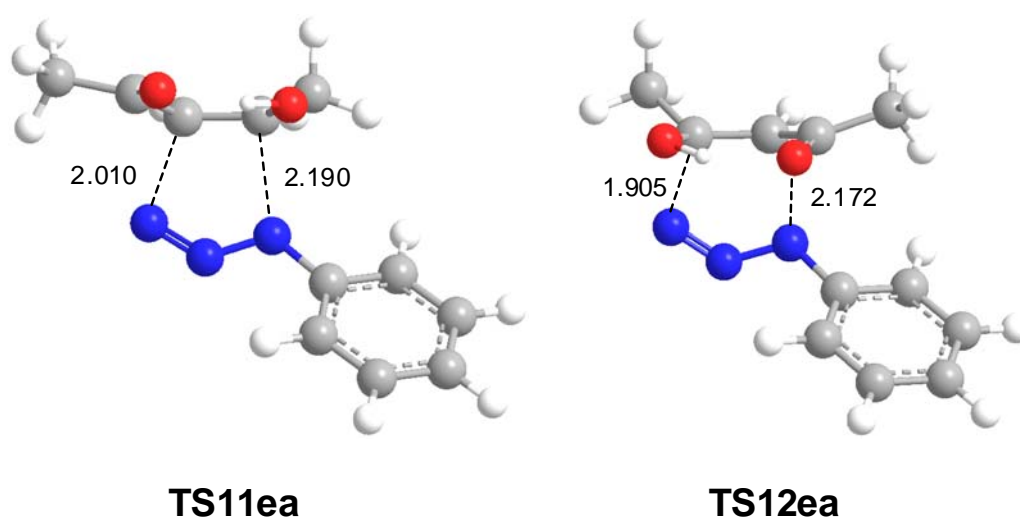

**Figure S1.** B3LYP/6-31G\* Transition states involved in the regioisomeric channels 1 and 2 associated with the 13DC reaction between the enol **2'a-Z** and phenyl azide (**1e**).

### Compound 3a

$^1\text{H}$  NMR (300 MHz,  $\text{CDCl}_3$ ):

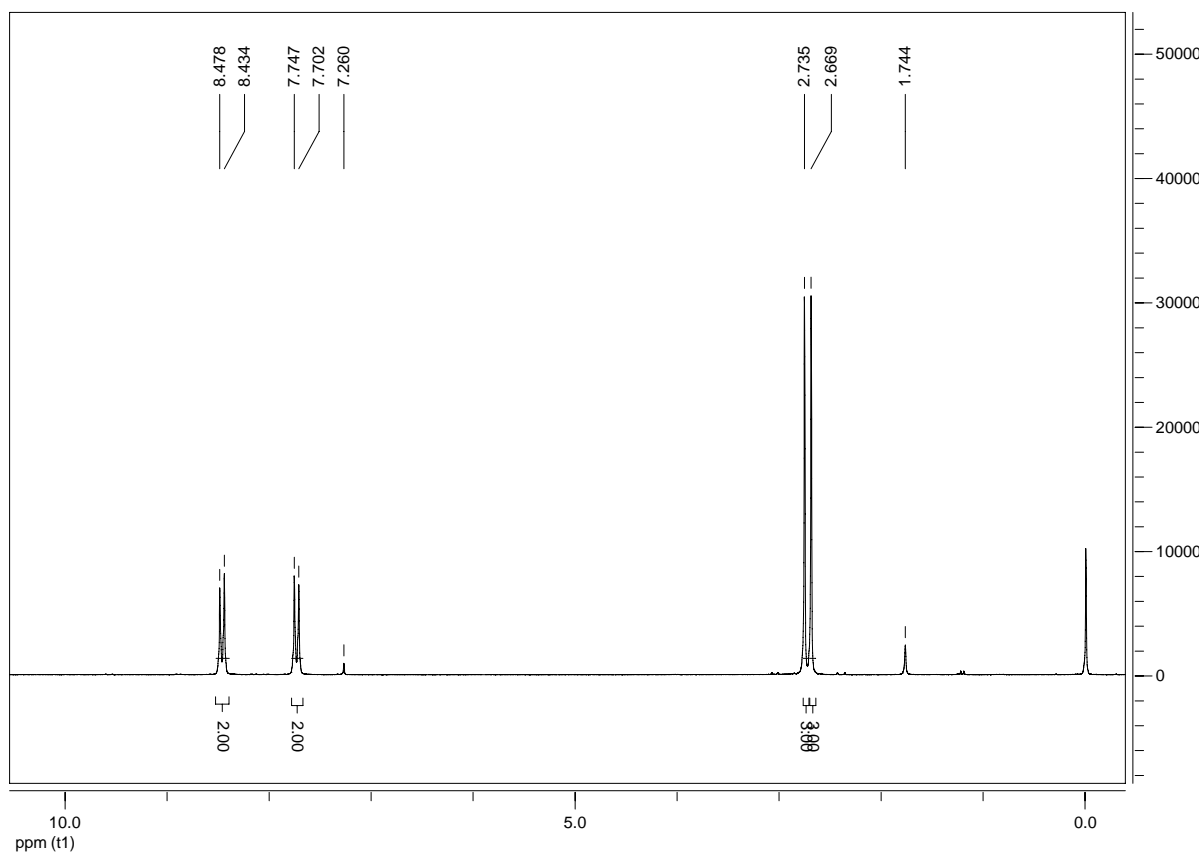

$^{13}\text{C}$  NMR (75 MHz,  $\text{CDCl}_3$ ):

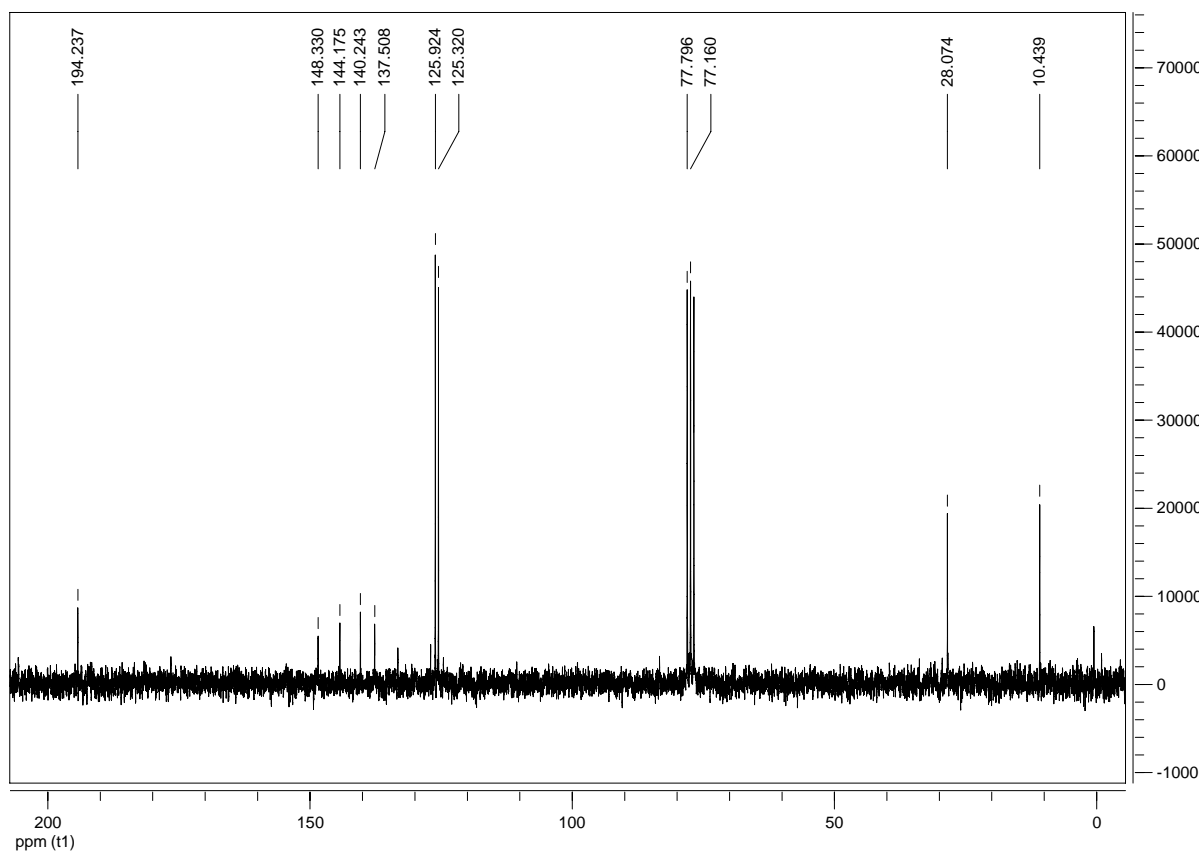

### Compound 3b

$^1\text{H}$  NMR (300 MHz,  $\text{CDCl}_3$ ):

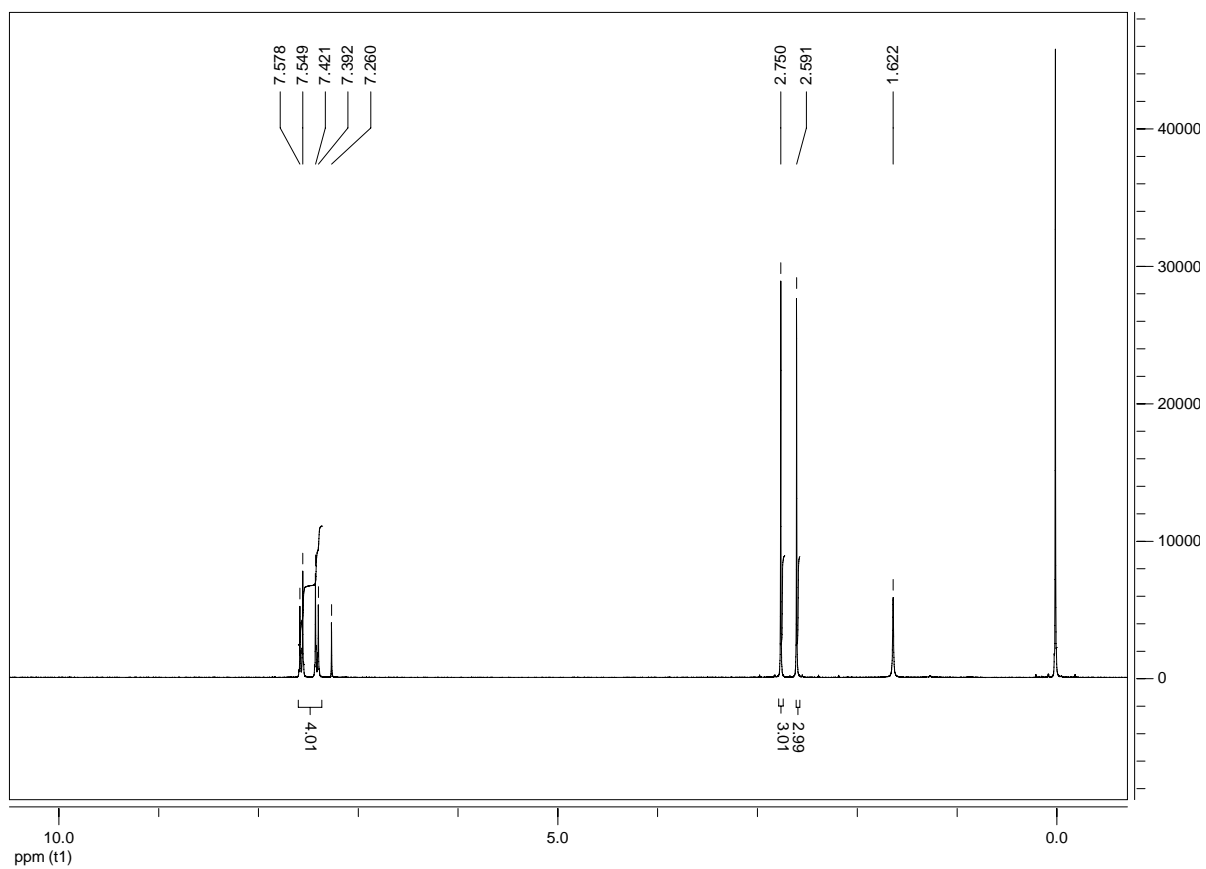

$^{13}\text{C}$  NMR (75 MHz,  $\text{CDCl}_3$ ):

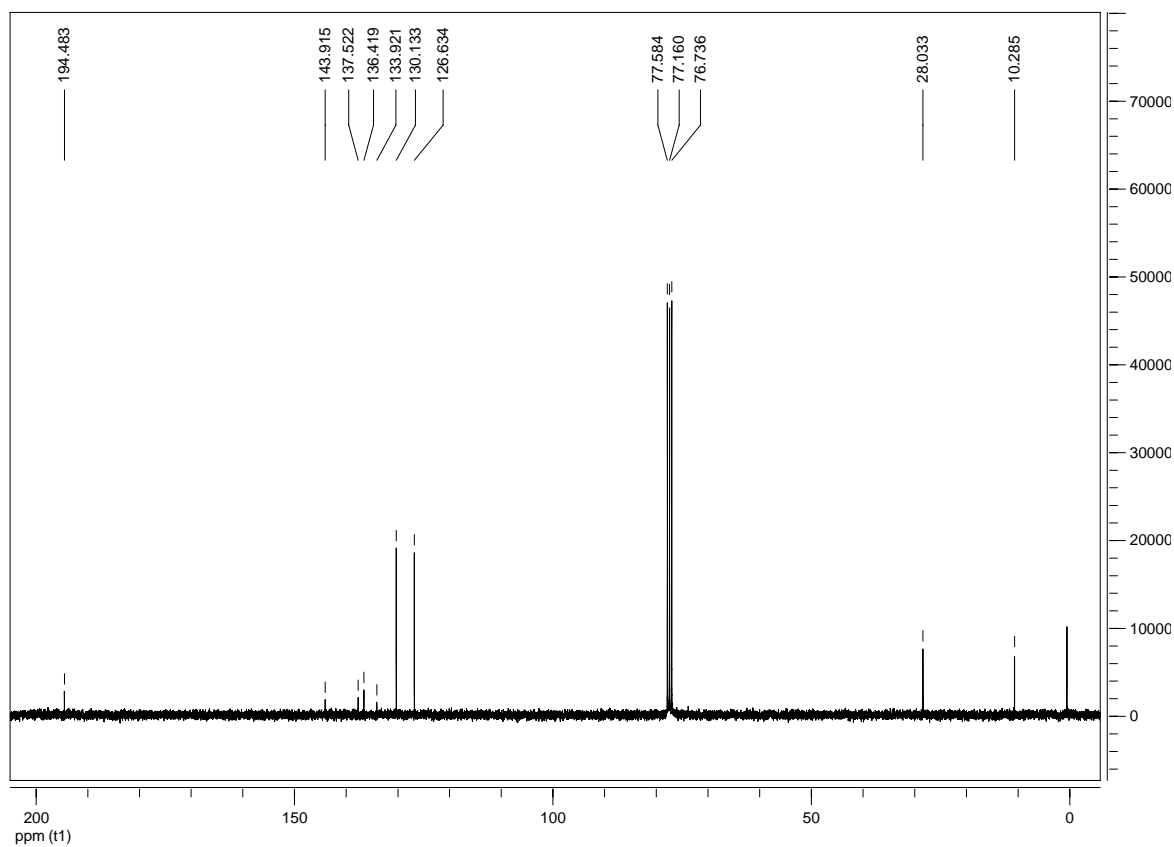

### Compound 3c

$^1\text{H}$  NMR (300 MHz,  $\text{CDCl}_3$ ):

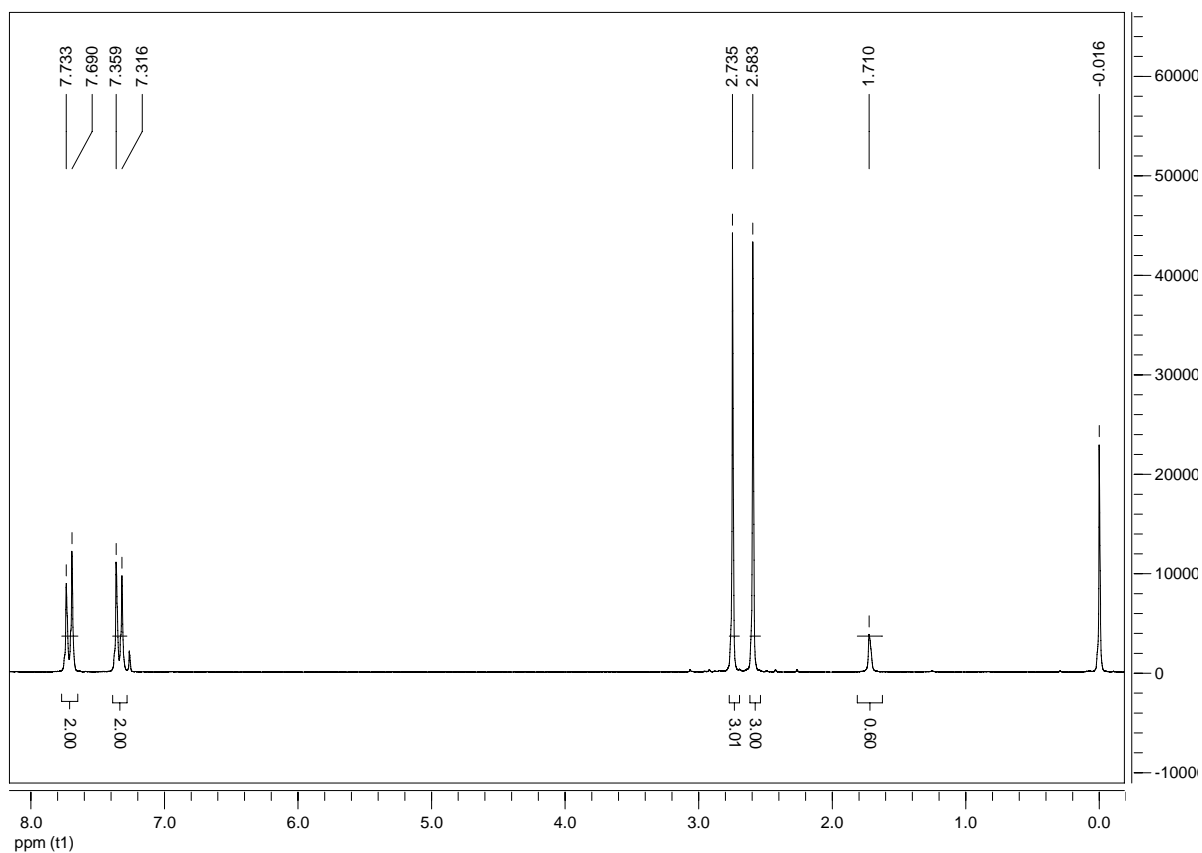

$^{13}\text{C}$  NMR (75 MHz,  $\text{CDCl}_3$ ):

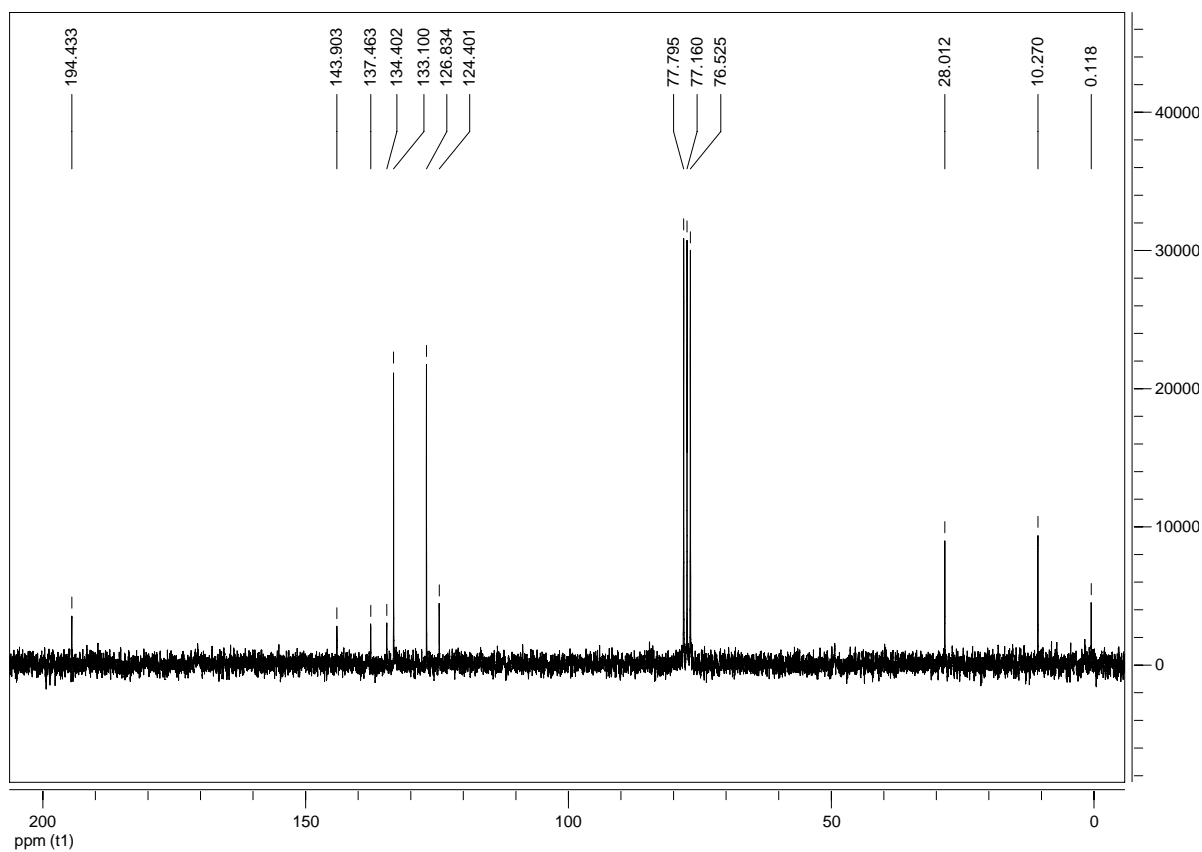



### Compound 3d

$^1\text{H}$  NMR (300 MHz,  $\text{CDCl}_3$ ):

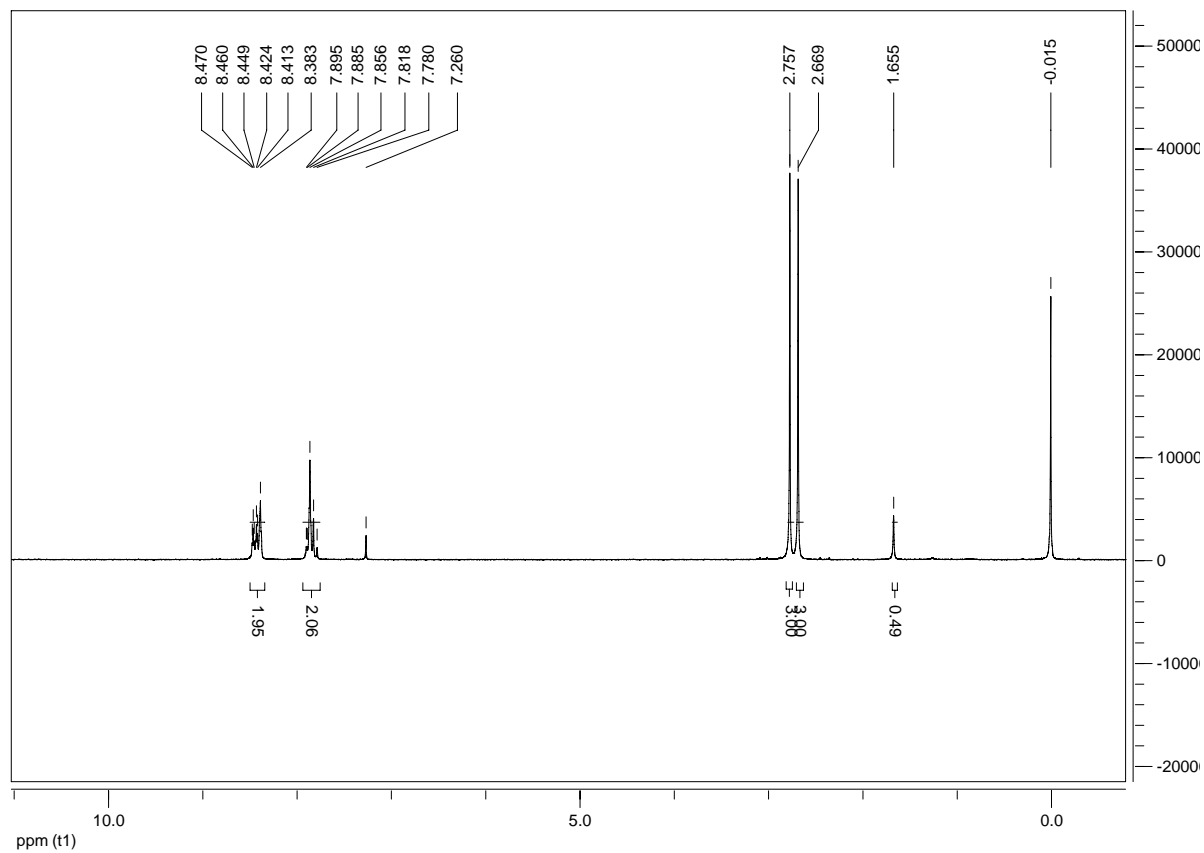

$^{13}\text{C}$  NMR (75 MHz,  $\text{CDCl}_3$ ):

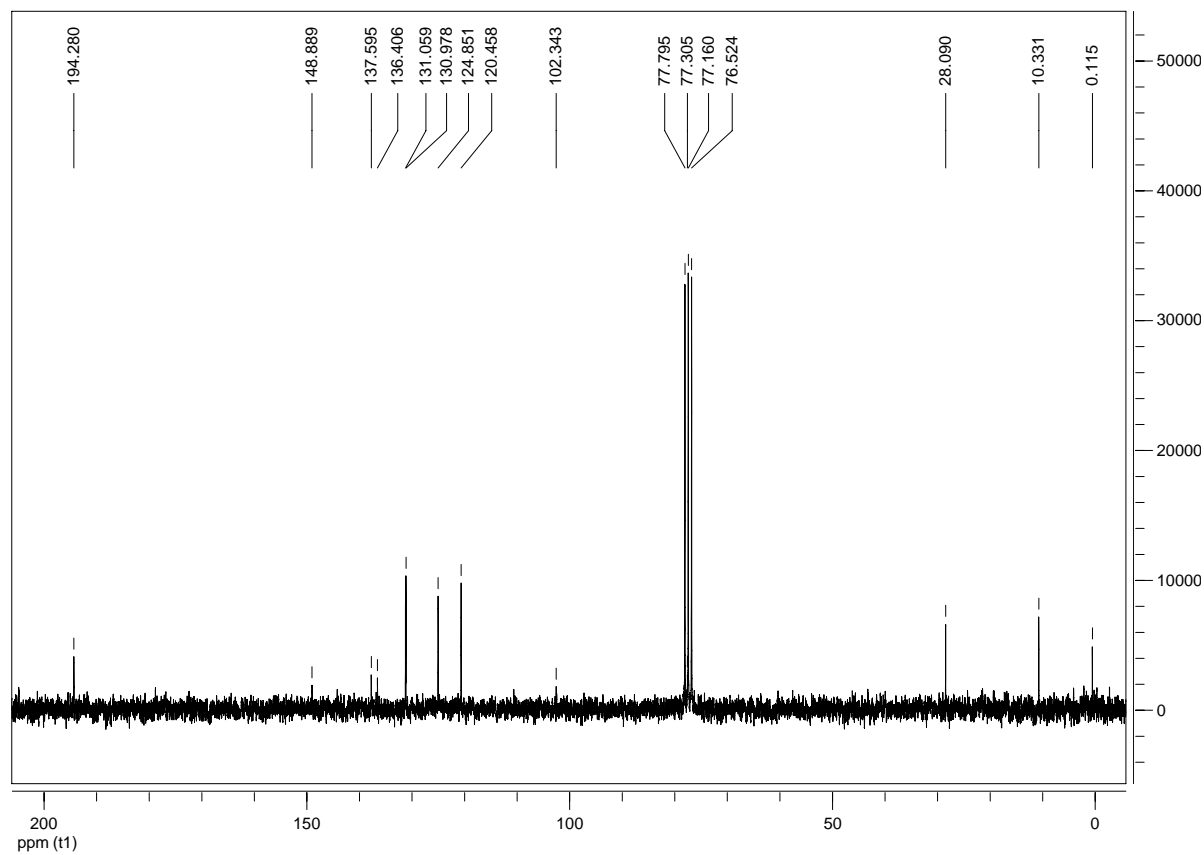

### Compound 3e

$^1\text{H}$  NMR (300 MHz,  $\text{CDCl}_3$ ):

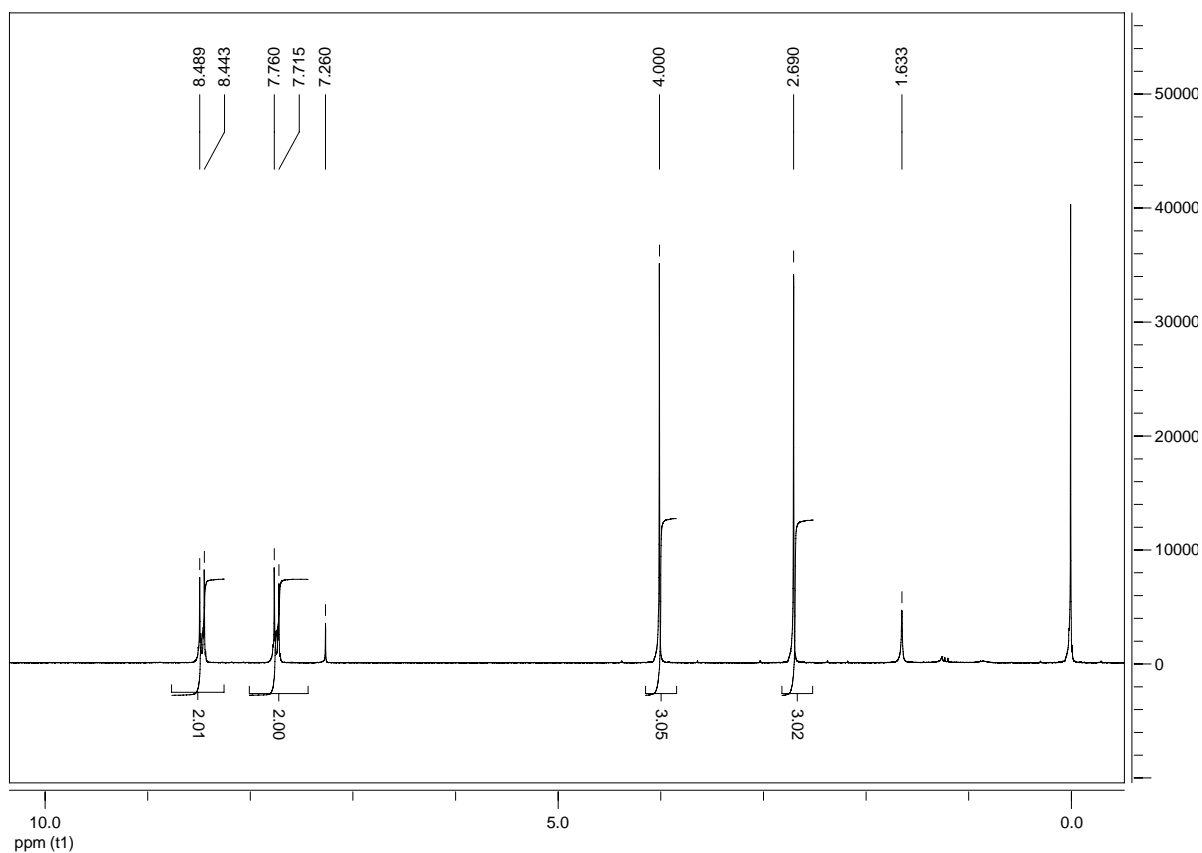

$^{13}\text{C}$  NMR (75 MHz,  $\text{CDCl}_3$ ):

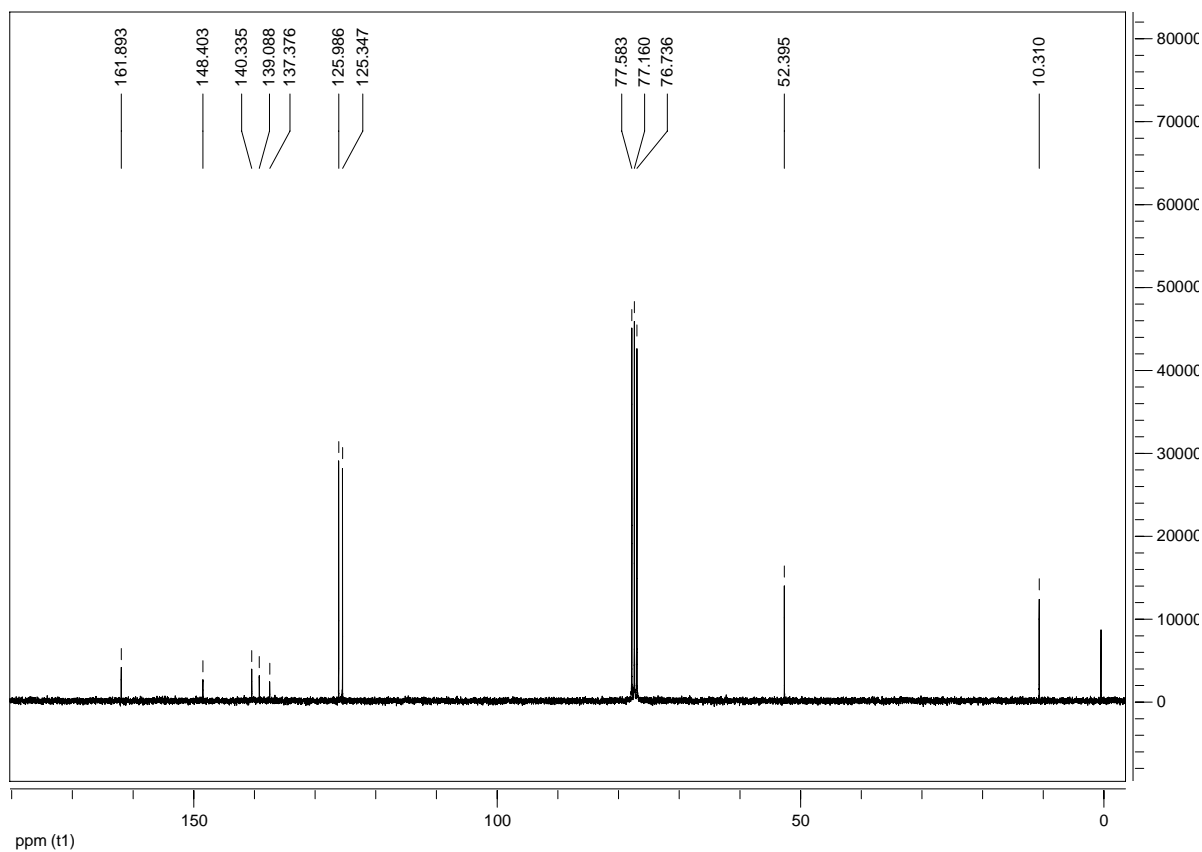

### Compound **3f**

$^1\text{H}$  NMR (300 MHz,  $\text{CDCl}_3$ ):

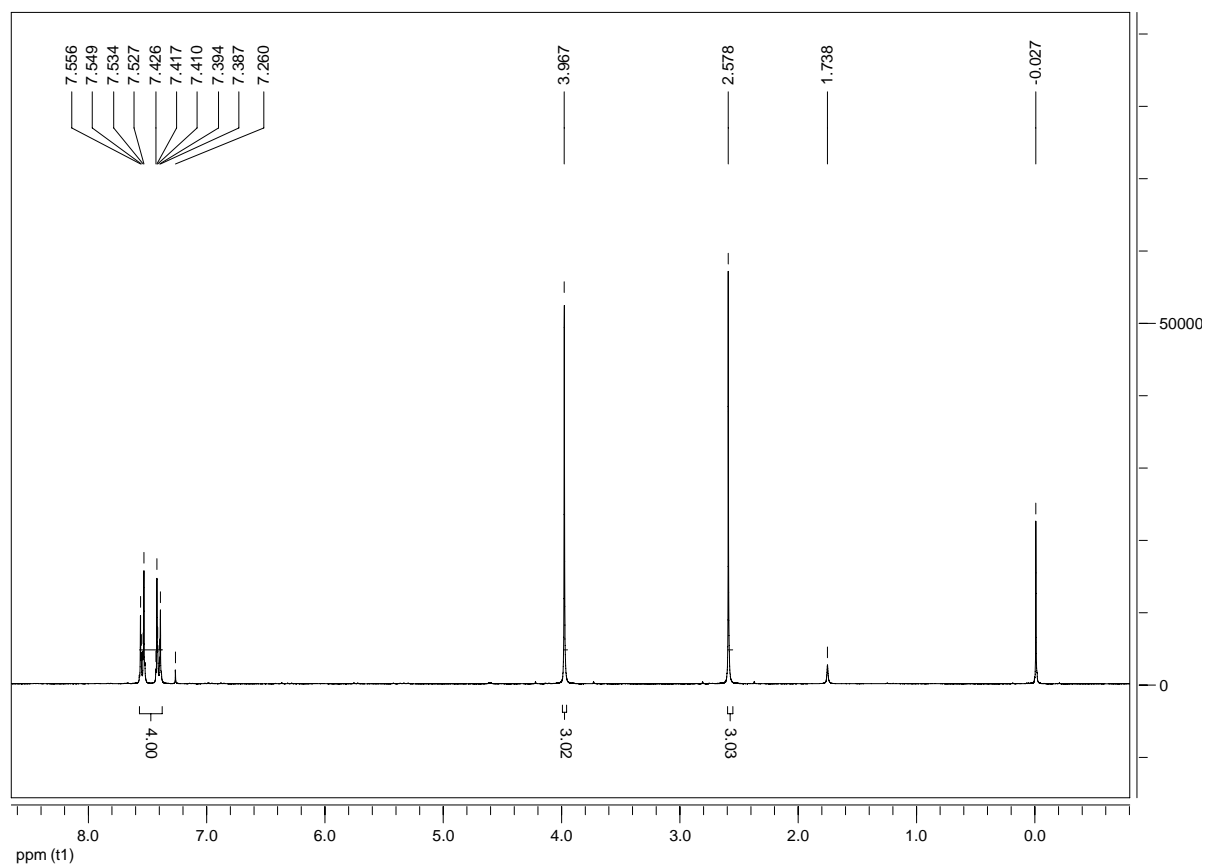

$^{13}\text{C}$  NMR (75 MHz,  $\text{CDCl}_3$ ):

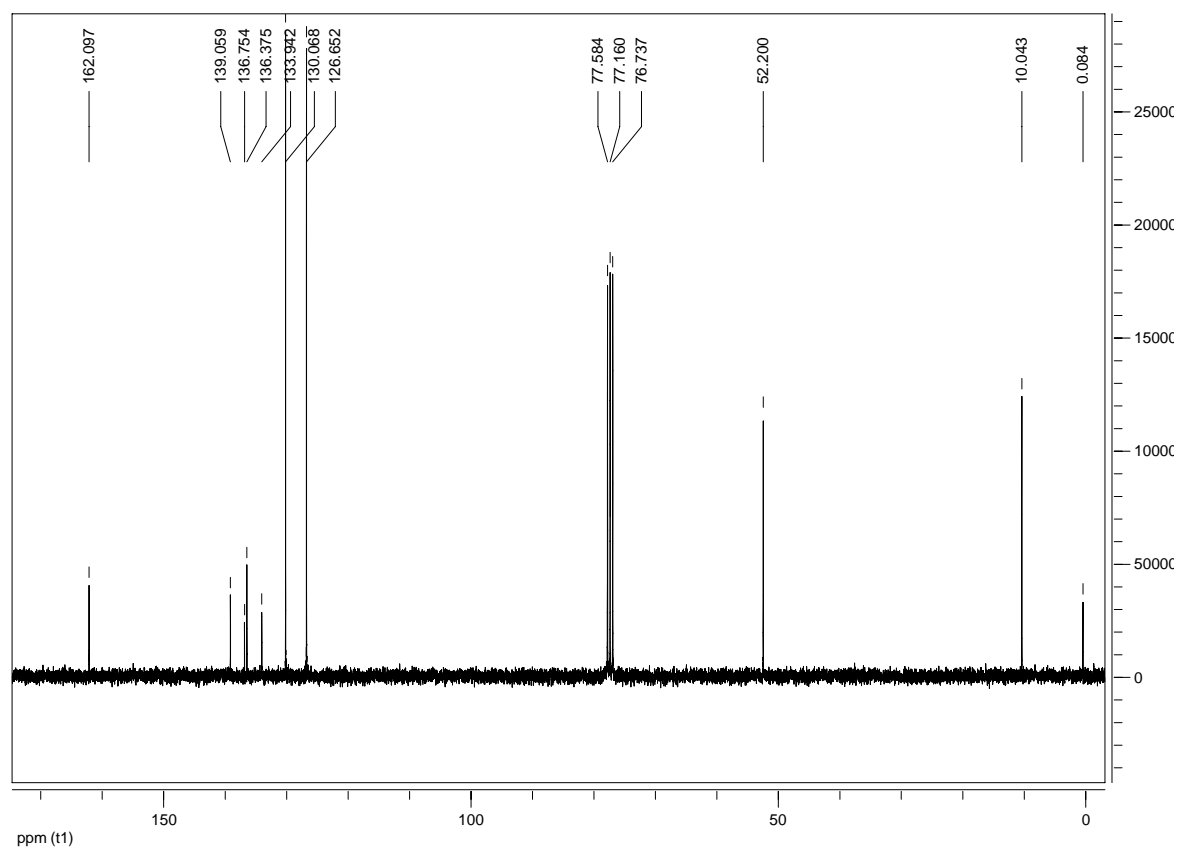

### Compound 3g

$^1\text{H}$  NMR (300 MHz,  $\text{CDCl}_3$ ):

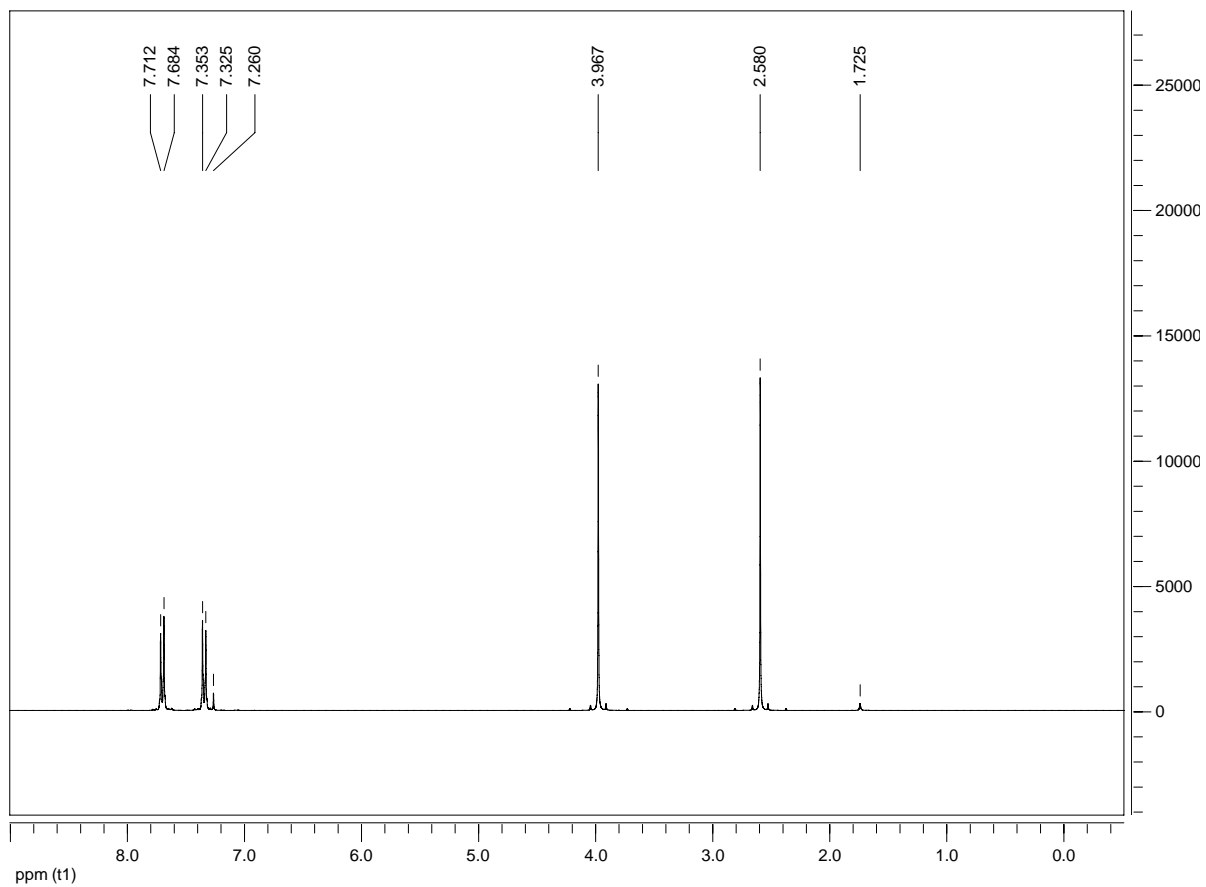

$^{13}\text{C}$  NMR (75 MHz,  $\text{CDCl}_3$ ):

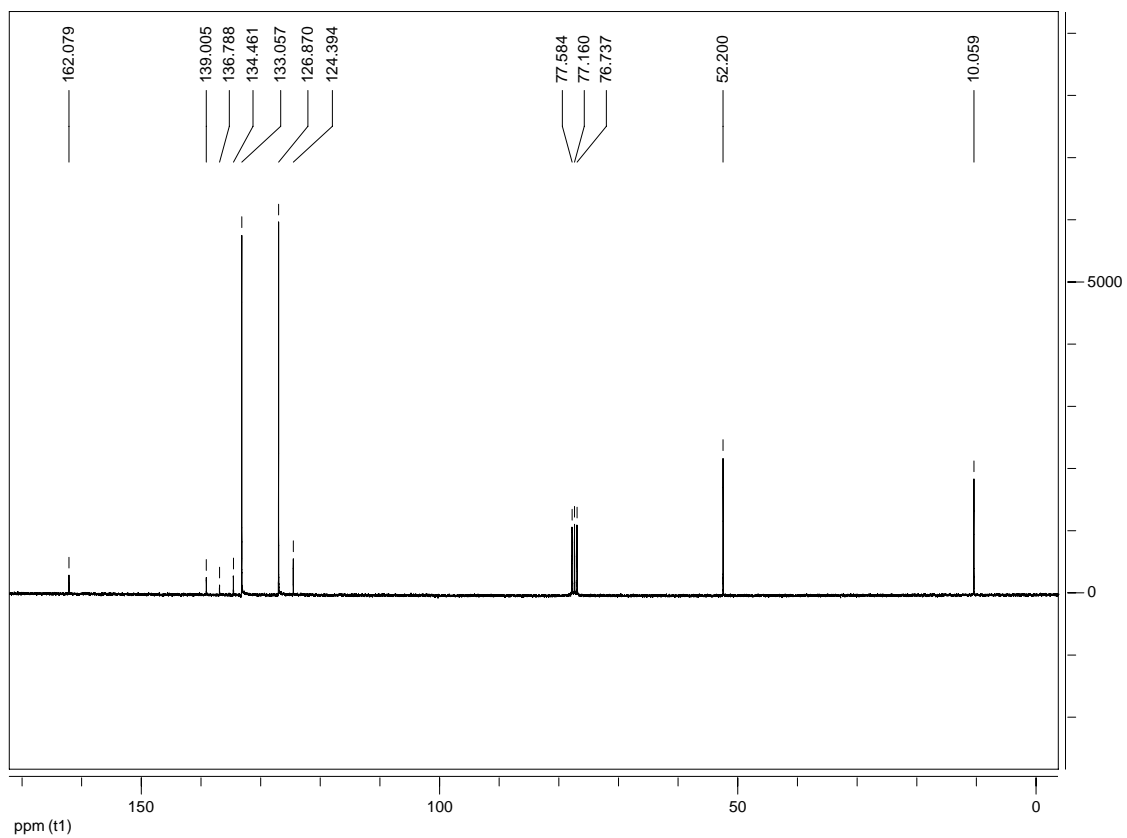

### Compound 3h

$^1\text{H}$  NMR (300 MHz,  $\text{CDCl}_3$ ):

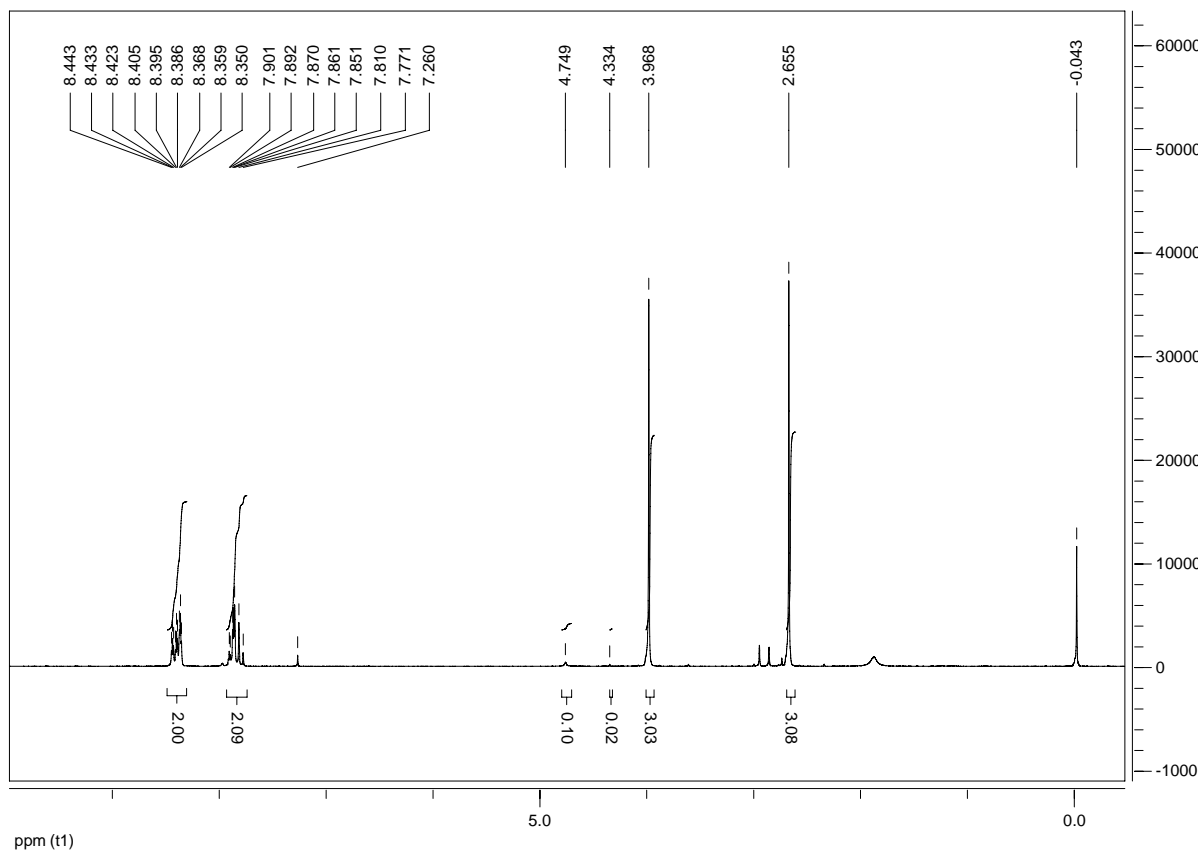

$^{13}\text{C}$  NMR (75 MHz,  $\text{CDCl}_3$ ):

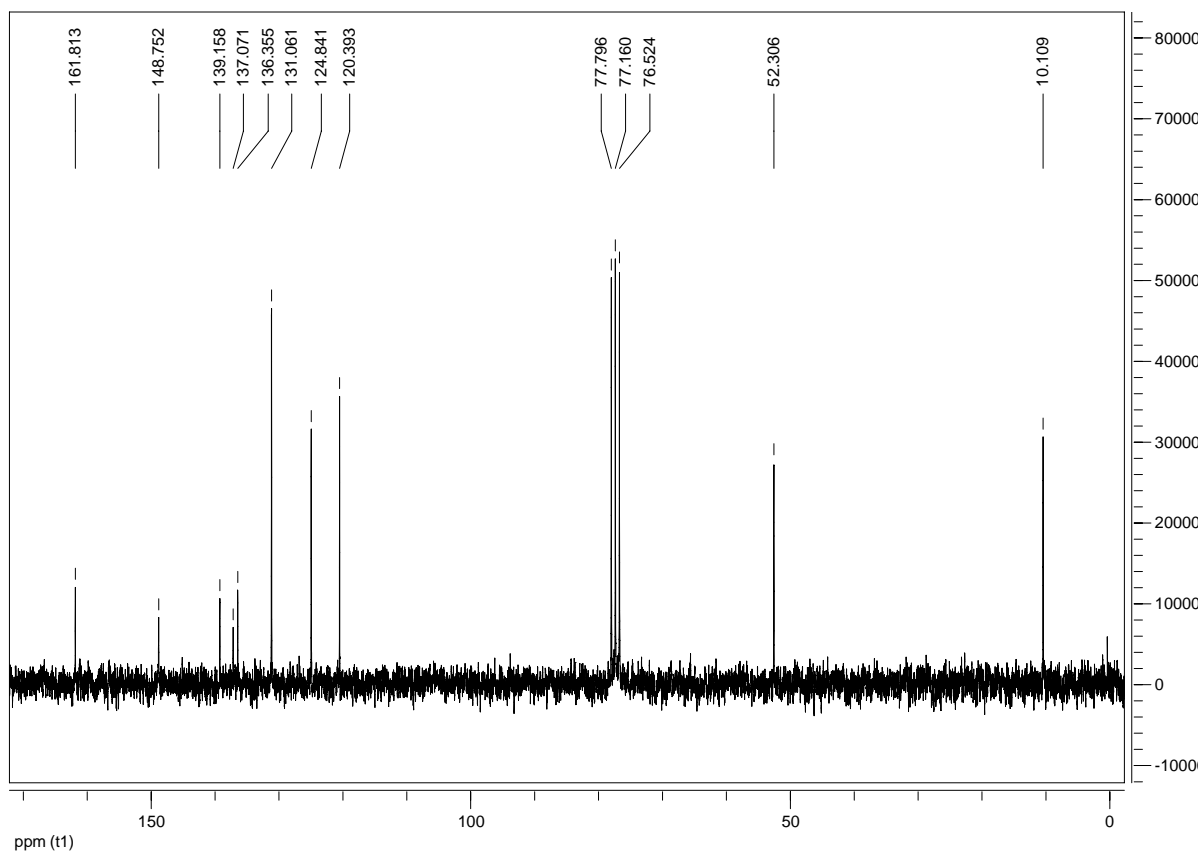

### Compound 5a

$^1\text{H}$  NMR (300 MHz,  $(\text{CD}_3)_2\text{CO}$ ):

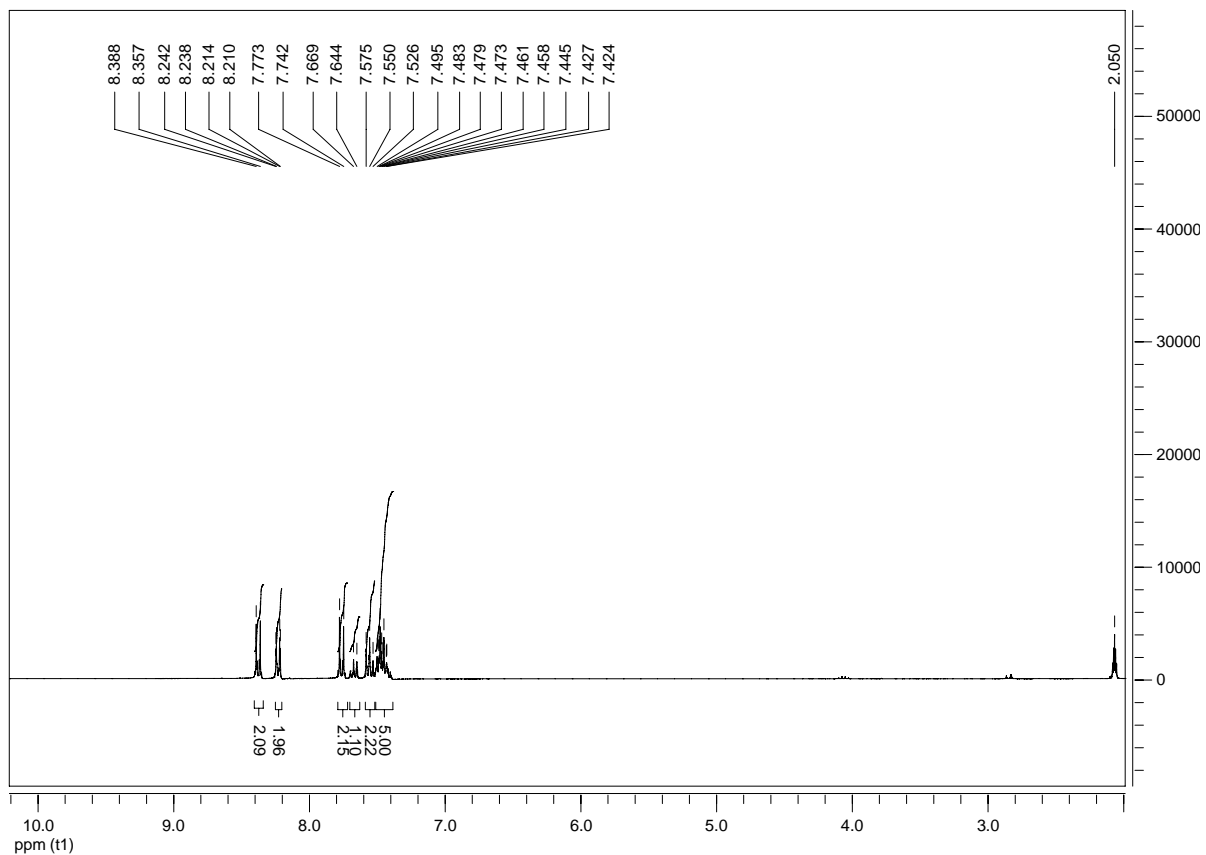

$^{13}\text{C}$  NMR (75 MHz,  $(\text{CD}_3)_2\text{CO}$ ):

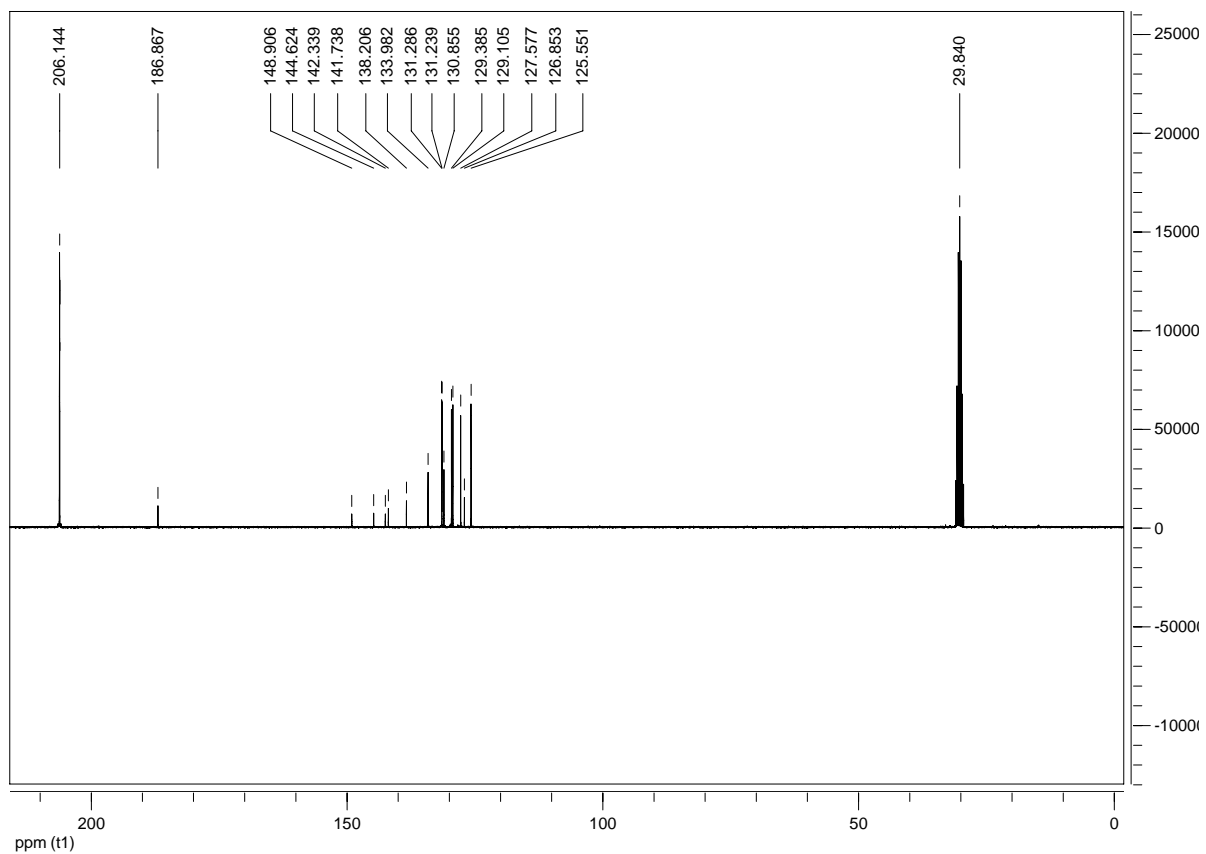

### Compound 5b

$^1\text{H}$  NMR (300 MHz,  $(\text{CD}_3)_2\text{CO}$ ):

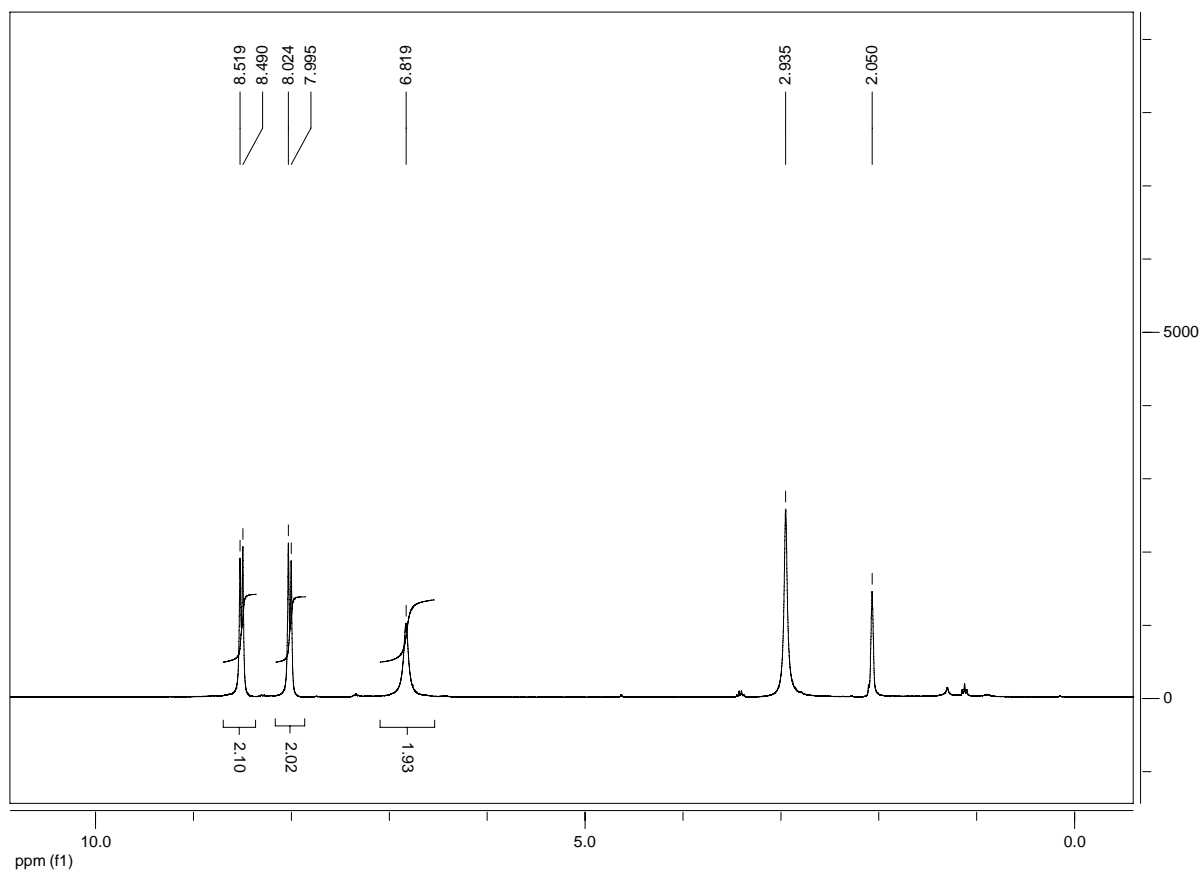

$^{13}\text{C}$  NMR (75 MHz,  $(\text{CD}_3)_2\text{CO}$ ):

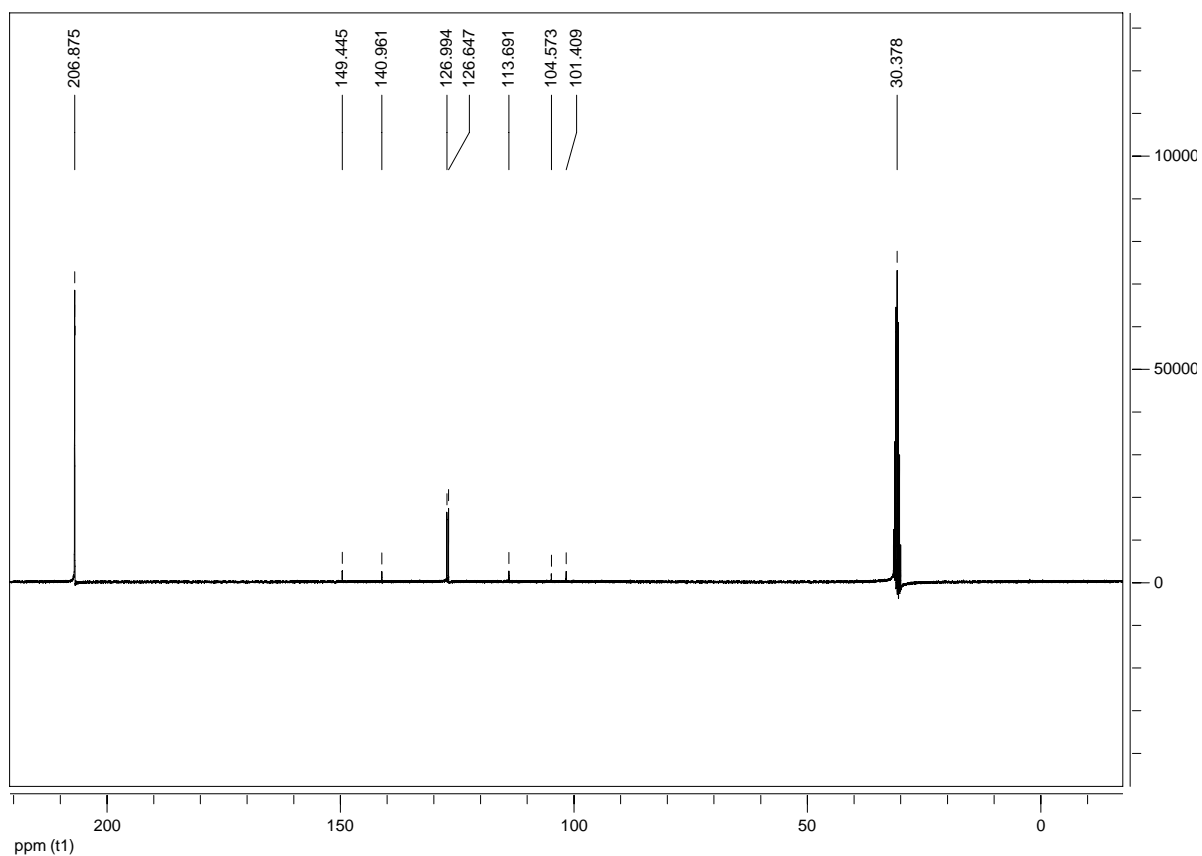

### Compound 8

$^1\text{H}$  NMR (200 MHz,  $(\text{CD}_3)_2\text{SO}$ ):

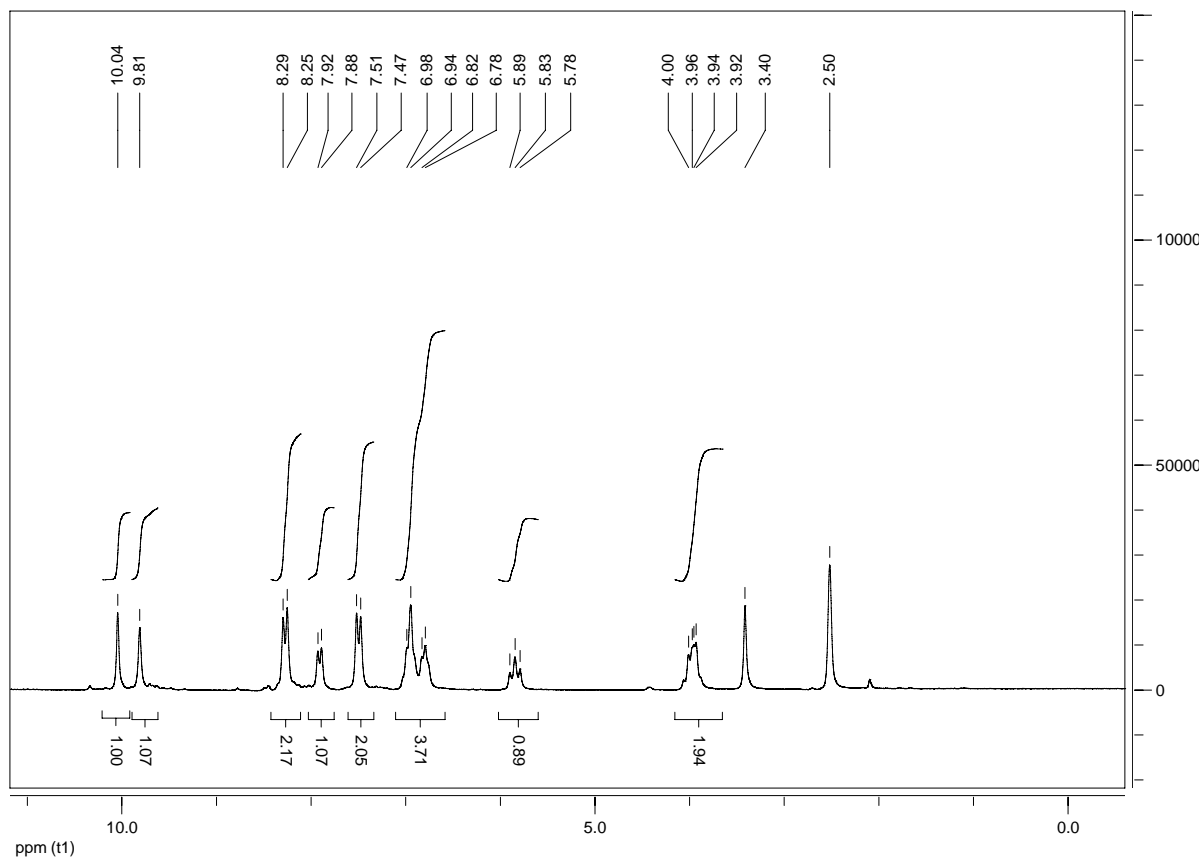

$^{13}\text{C}$  NMR (50 MHz,  $(\text{CD}_3)_2\text{SO}$ ):

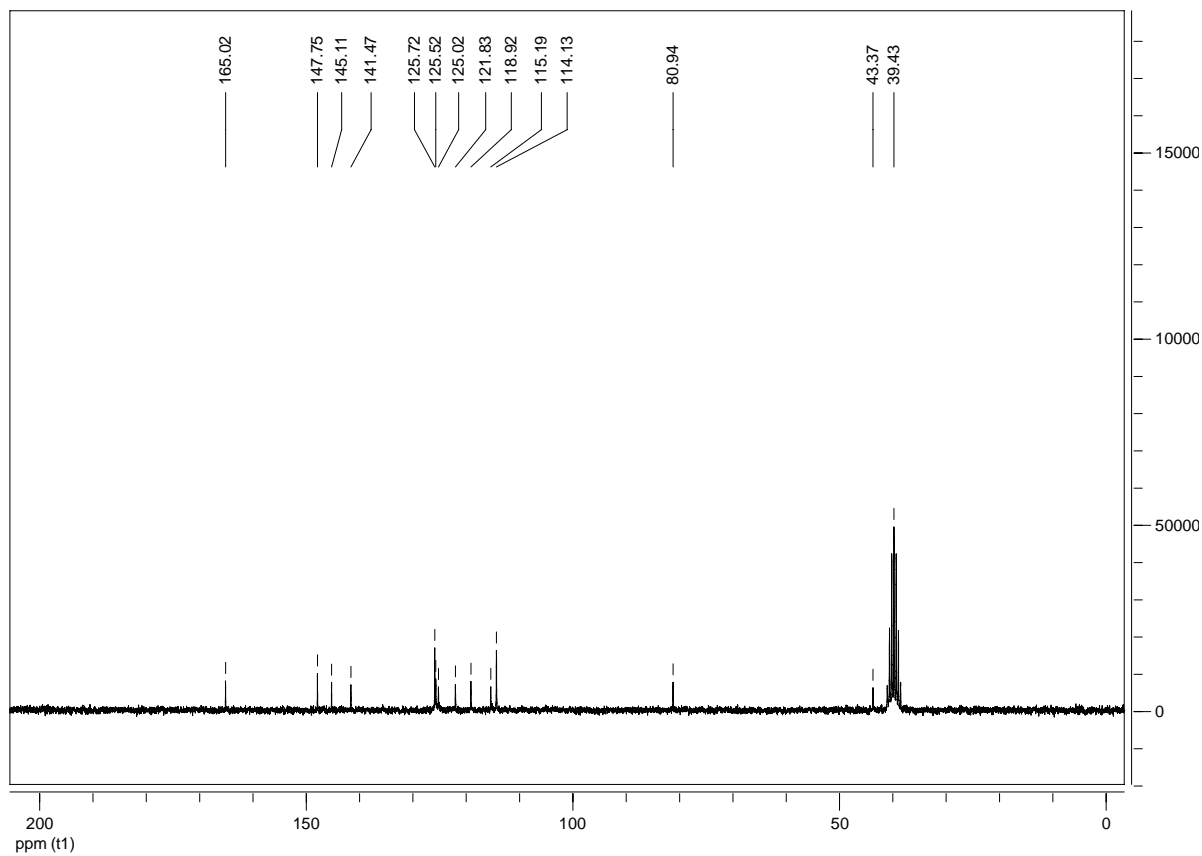



### Compound 10

$^1\text{H}$  NMR (200 MHz,  $\text{CDCl}_3$ ):

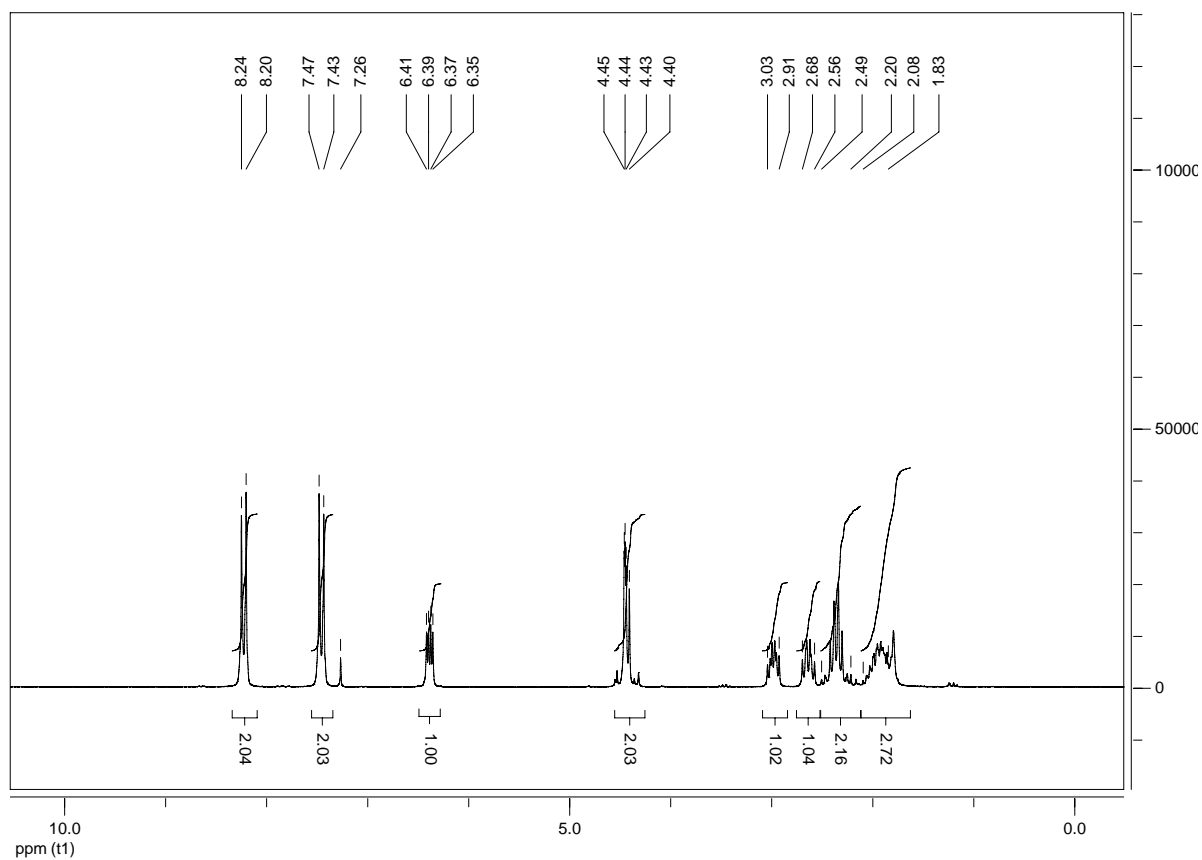

$^{13}\text{C}$  NMR (50 MHz,  $\text{CDCl}_3$ ):

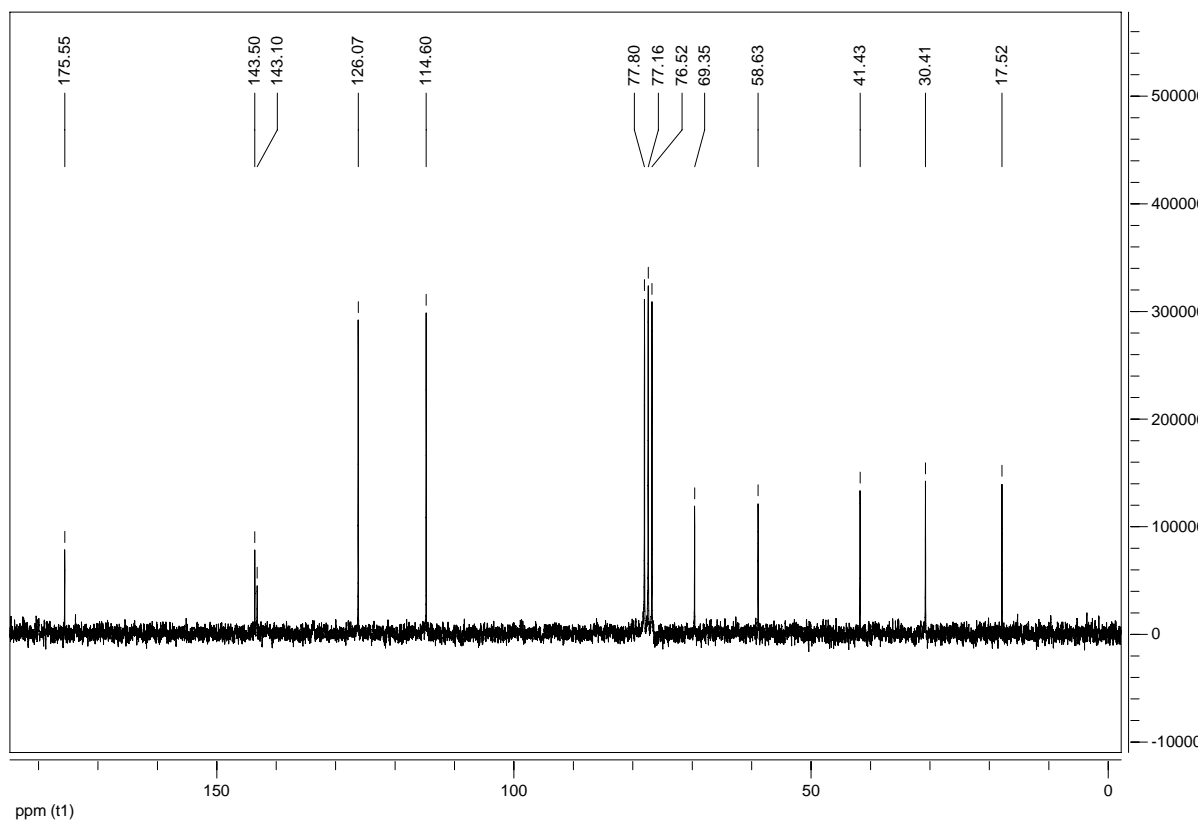

## X-Ray diagrams

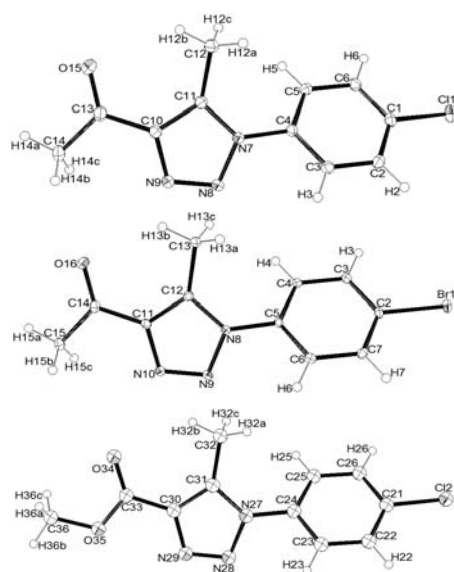

**Fig. 1** ORTEP diagrams (30% probability) of cycloadducts **3b,c**, and **3f**.

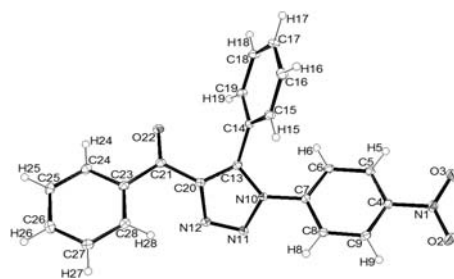

**Fig. 2** ORTEP diagram (30% probability) of cycloadduct **5a**.
